# Supplementary material
Source: Research Square preprint supplement (doi:10.21203/rs.3.rs-8916981/v1)
Supplement: Supplementary file 1 [file 0068d141115864a17da06b6a.xlsx]

## Sheet: Table3_AVISPA
Security Goal	HLPSL Claim	OFMC Result	CL-AtSe Result	Attack Trace
Data secrecy	secrecy_of M	SAFE	SAFE	None
Key secrecy (aggregate/secret key)	secrecy_of Kagg, sk	SAFE	SAFE	None
Mutual authentication (Device–Edge/Cloud)	authentication_on auth_req	SAFE	SAFE	None
Replay resistance	authentication_on nonce_fresh	SAFE	SAFE	None
MITM resistance (message integrity)	authentication_on msg_integrity	SAFE	SAFE	None
Impersonation resistance	authentication_on device_id	SAFE	SAFE	None

## Sheet: Table4_Computation
Scheme	Encryption Cost	Search Cost	Decryption Cost	Revocation Cost
Kumar et al. [12]	(3P + 4E + H)	(2P + E)	(2E)	Re-encryption
Deng et al. [31]	(4P + 3E)	(2P)	(3E)	Partial update
Li et al. [22]	(3E + 2H)	(2E)	(2E)	Linear update
BS-ADS (Ours)	(2E + 2H + S)	(E + H)	(E + S)	(E)

## Sheet: Table5_Communication
Operation	Message Components	Communication Cost
Data Upload	(C_M, C_W, Tag, aux)	O(1)
Search Request	Trapdoor (T_w)	O(1)
Search Response	Ciphertext (C_M)	O(1)
Revocation Update	Updated ciphertext (C')	O(1)
Blockchain Log	Hash + metadata	O(1)

## Sheet: Table6_Storage
Scheme	Cloud Storage	Blockchain Storage	Key Storage
Public Blockchain Schemes	High	High	Moderate
Private Blockchain Schemes	Moderate	Moderate	High
BS-ADS (Ours)	Encrypted data only	Hashes + metadata	Single aggregate key

## Sheet: Table7_Scalability
Feature	Existing Schemes	BS-ADS
Key Management	Linear	Constant
Search Complexity	Linear	Constant
Revocation Overhead	High	Low
Blockchain Dependency	Heavy	Lightweight
